1 **Potent binding of 2019 novel coronavirus spike protein by a**  
2 **SARS coronavirus-specific human monoclonal antibody**

3 Xiaolong Tian<sup>a#</sup>, Cheng Li<sup>a#</sup>, Ailing Huang<sup>a</sup>, Shuai Xia<sup>a</sup>, Sicong Lu<sup>a</sup>, Zhengli Shi<sup>c</sup>, Lu  
4 Lu<sup>a</sup>, Shibo Jiang<sup>a</sup>, Zhenlin Yang<sup>b\*</sup>, Yanling Wu<sup>a\*</sup> and Tianlei Ying<sup>a\*</sup>

5 <sup>a</sup>*MOE/NHC/CAMS Key Laboratory of Medical Molecular Virology, School of Basic*  
6 *Medical Sciences, Shanghai Medical College, Fudan University, Shanghai, China;*

7 <sup>b</sup>*Department of Pulmonary Medicine, Zhongshan Hospital, Fudan University,*  
8 *Shanghai, China;*

9 <sup>c</sup>*CAS Key Laboratory of Special Pathogens, Wuhan Institute of Virology, Center for*  
10 *Biosafety Mega-Science, Chinese Academy of Sciences, Wuhan, China.*

11 \*Correspondence: Tianlei Ying ([tlying@fudan.edu.cn](mailto:tlying@fudan.edu.cn)), Yanling Wu  
12 ([yanlingwu@fudan.edu.cn](mailto:yanlingwu@fudan.edu.cn)), or Zhenlin Yang ([yang\\_zhenlin@fudan.edu.cn](mailto:yang_zhenlin@fudan.edu.cn))

13 Room 504, Fosun Building, 131 Dong-an Road, Shanghai 200032, China  
14 Tel: 86-21-54237761

15

16

17 **Keywords:** 2019-nCoV, SARS-CoV, monoclonal antibody, spike protein, binding  
18 affinity

19

20

21

22

23

24

25

26 **ABSTRACT**

27 The newly identified 2019 novel coronavirus (2019-nCoV) has caused more than 800  
28 laboratory-confirmed human infections, including 25 deaths, posing a serious threat to  
29 human health. Currently, however, there is no specific antiviral treatment or vaccine.  
30 Considering the relatively high identity of receptor binding domain (RBD) in  
31 2019-nCoV and SARS-CoV, it is urgent to assess the cross-reactivity of  
32 anti-SARS-CoV antibodies with 2019-nCoV spike protein, which could have  
33 important implications for rapid development of vaccines and therapeutic antibodies  
34 against 2019-nCoV. Here, we report for the first time that a SARS-CoV-specific  
35 human monoclonal antibody, CR3022, could bind potently with 2019-nCoV RBD  
36 (KD of 6.3 nM). The epitope of CR3022 does not overlap with the ACE2 binding site  
37 within 2019-nCoV RBD. Therefore, CR3022 has the potential to be developed as  
38 candidate therapeutics, alone or in combination with other neutralizing antibodies, for  
39 the prevention and treatment of 2019-nCoV infections. Interestingly, some of the most  
40 potent SARS-CoV-specific neutralizing antibodies (e.g., m396, CR3014) that target  
41 the ACE2 binding site of SARS-CoV failed to bind 2019-nCoV spike protein,  
42 indicating that the difference in the RBD of SARS-CoV and 2019-nCoV has a critical  
43 impact for the cross-reactivity of neutralizing antibodies, and that it is still necessary  
44 to develop novel monoclonal antibodies that could bind specifically to 2019-nCoV  
45 RBD.

46

47 Very recently, a novel coronavirus which was temporarily named “2019 novel  
48 coronavirus (2019-nCoV)” emerged in Wuhan, China [1]. As of 24 January, 2020,  
49 2019-nCoV has resulted in a total of 830 laboratory-confirmed human infections,  
50 including 25 deaths, in 29 provinces and regions in China, and a number of exported  
51 cases in other countries  
52 ([http://www.chinacdc.cn/jkzt/crb/zl/szkb\\_11803/jszl\\_11809/202001/t20200124\\_2114](http://www.chinacdc.cn/jkzt/crb/zl/szkb_11803/jszl_11809/202001/t20200124_2114)  
53 [11.html](#)). The person-to-person spread has been confirmed by the findings that there  
54 were 15 medical care personnel infections and several family transmission cases,  
55 indicating the severe infectivity and pathogenicity of this virus. Currently, however,  
56 there is no vaccine or effective antiviral treatment against 2019-nCoV infection.

57 Based on the phylogenetic analysis (GISAID accession no. EPI\_ISL\_402124) [2],  
58 2019-nCoV belongs to lineage B betacoronavirus and shares high sequence identity  
59 with that of bat or human severe acute respiratory syndrome coronavirus-related  
60 coronavirus (SARSr-CoV) and bat SARS-like coronavirus (SL-CoV) (Figure 1a). In  
61 previous studies, a number of potent monoclonal antibodies against SARS  
62 coronavirus (SARS-CoV) have been identified [3-7]. These antibodies target the spike  
63 protein (S) of SARS-CoV and SL-CoVs, which is a type I transmembrane  
64 glycoprotein and mediates the entrance to human respiratory epithelial cells by  
65 interacting with cell surface receptor angiotensin-converting enzyme 2 (ACE2) [8].  
66 More specifically, the 193 amino acid length (N318-V510) receptor binding domain  
67 (RBD) within S protein is the critical target for neutralizing antibodies [9]. We  
68 predicted the conformation of 2019-nCoV RBD as well as its complex structures with

69 several neutralizing antibodies (Supplementary Methods), and found that the  
70 modelling results support the interactions between 2019-nCoV RBD and certain  
71 SARS-CoV antibodies (Figure 1b). This could be due to the relatively high identity  
72 (73%) of RBD in 2019-nCoV and SARS-CoV (Figure 1c). For instance, residues in  
73 RBD of SARS-CoV that make polar interactions with a neutralizing antibody m396 as  
74 indicated by the complex crystal structure [10] are invariably conserved in  
75 2019-nCoV RBD (Figure 1d). In the structure of SARS-CoV-RBD-m396, R395 in  
76 RBD formed a salt bridge with D95 of m396-VL. Concordantly, the electrostatic  
77 interaction was also observed in the model of 2019-nCoV-RBD-m396, forming by  
78 R408 (RBD) and D95 (m396-VL). This analysis suggests that some  
79 SARS-CoV-specific monoclonal antibodies may be effective in neutralizing  
80 2019-nCoV. In contrast, the interactions between antibody F26G19 [11] or 80R [12]  
81 and the RBD in 2019-nCoV decreased significantly due to the lack of salt bridges  
82 formed by R426-D56 in SARS-CoV-RBD-F26G19 or D480-R162 in  
83 SARS-CoV-RBD-80R, respectively. Furthermore, while most of the 80R-binding  
84 residues on the RBD of SARS-CoV are not conserved on RBD of 2019-nCoV (Figure  
85 1c), it is unlikely that the antibody 80R could effectively recognize 2019-nCoV.  
86 Therefore, it is urgent to experimentally determine the cross-reactivity of  
87 anti-SARS-CoV antibodies with 2019-nCoV spike protein, which could have  
88 important implications for rapid development of vaccines and therapeutic antibodies  
89 against 2019-nCoV.

90 In this study, we first expressed and purified 2019-nCoV RBD protein

91 (Supplementary Methods). We also predicted the conformations of 2019-nCoV RBD  
92 and its complex with the putative receptor, human ACE2 (Supplementary Methods).  
93 Comparison of the interaction between complex of ACE2 [13] and SARS-CoV RBD  
94 and homology model of ACE2 and 2019-nCoV RBD revealed similar binding modes  
95 (data not shown). In both complexes,  $\beta$ 5- $\beta$ 6 loop and  $\beta$ 6- $\beta$ 7 loop form extensive  
96 contact, including at least seven pairs of hydrogen bonds, with the receptor. Notably,  
97 R426 on the forth  $\alpha$  helix in SARS-CoV RBD builds a salt bridge with E329 and a  
98 hydrogen bond with Q325 on ACE2. However, the arginine (R426 in SARS-CoV  
99 RBD) to asparagine (N439) mutation in 2019-nCoV RBD abolished the strong polar  
100 interactions, which may induce a decrease in the binding affinity between RBD and  
101 the receptor. Interestingly, a lysine (K417 in 2019-nCoV RBD) replacement of valine  
102 (V404 in SARS-CoV RBD) on  $\beta$ 6 formed an extra salt bridge with D30 on ACE2,  
103 which may recover the binding ability. These data indicate that the RBD in S protein  
104 of 2019-nCoV may bind to ACE2 with the similar affinity as SARS-CoV RBD does.  
105 Indeed, we measured the binding of 2019-nCoV RBD to human ACE2 by the biolayer  
106 interferometry binding (BLI) assay, and found that 2019-nCoV RBD bound potently  
107 to ACE2. The calculated affinity ( $K_D$ ) of 2019-nCoV RBD with human ACE2 was  
108 15.2 nM (Figure 1f), which is comparable to that of SARS-CoV spike protein with  
109 human ACE2 (15 nM) [14]. These results indicate that ACE2 could be the potential  
110 receptor for the new coronavirus, and that the expressed 2019-nCoV RBD protein is  
111 functional [2].

112 Next, we expressed and purified several representative SARS-CoV-specific

113 antibodies (Supplementary Methods) which have been reported to target RBD and  
114 possess potent neutralizing activities, including m396 [3], CR3014 [4], CR3022 [5],  
115 as well as a MERS-CoV-specific human monoclonal antibody m336 developed by our  
116 laboratory [15], and measured their binding ability to 2019-nCoV RBD by ELISA  
117 (Supplementary Methods, Figure 1e). Surprisingly, we found that most of these  
118 antibodies did not show evident binding to 2019-nCoV RBD. To confirm this result,  
119 we further measured the binding kinetics using BLI (Supplementary Methods). An  
120 irrelevant anti-CD40 antibody was used as negative control. Similarly, the antibody  
121 m396, which was predicted to bind 2019-nCoV RBD (Figure 1d), only showed slight  
122 binding at the highest measured concentration (2  $\mu$ M). Interestingly, we found that  
123 there are several additional asparagine residues in 2019-nCoV RBD as compared with  
124 SARS-CoV RBD. For instance, the N439 residue is located in the receptor binding  
125 site within 2019-nCoV RBD. It could be hypothesized that Asn-linked glycosylation  
126 may occur, rendering the computationally simulated models far from the native  
127 structures. Further studies are needed to solve the high-resolution structure of  
128 2019-nCoV RBD and understand why it could not be recognized by these antibodies.

129 Notably, one SARS-CoV-specific antibody, CR3022, was found to bind potently  
130 with 2019-nCoV RBD as determined by ELISA and BLI (Figure 1e, 1f). It followed a  
131 fast-on ( $k_{\text{on}}$  of  $1.84 \times 10^5 \text{ M}^{-1} \text{ s}^{-1}$ ) and slow-off ( $k_{\text{off}}$  of  $1.16 \times 10^{-3} \text{ s}^{-1}$ ) binding kinetics,  
132 resulting in a  $K_{\text{D}}$  of 6.3 nM (Figure 1f). This antibody was isolated from blood of a  
133 convalescent SARS patient, and did not compete with the antibody CR3014 for  
134 binding to recombinant S protein [5]. To further elucidate the binding epitopes of

135 CR3022, we measured the competition of CR3022 and human ACE2 for the binding  
136 to 2019-nCoV RBD (Supplementary Methods). The streptavidin biosensors labelled  
137 with biotinylated 2019-nCoV RBD were saturated with human ACE2 in solution,  
138 followed by the addition of the test antibodies in the presence of ACE2. As shown in  
139 Figure 1g, the antibody CR3022 did not show any competition with ACE2 for the  
140 binding to 2019-nCoV RBD. These results suggest that CR3022, distinct from the  
141 other two SARS-CoV antibodies, recognizes an epitope that does not overlap with the  
142 ACE2 binding site of 2019-nCoV RBD.

143 The RBD of 2019-nCoV differ largely from the SARS-CoV at the C-terminus  
144 residues (Figure 1c). Our results implied that such difference did not result in drastic  
145 changes in the capability to engage the ACE2 receptor, but had a critical impact for  
146 the cross-reactivity of neutralizing antibodies. Some of the most potent  
147 SARS-CoV-specific neutralizing antibodies (e.g., m396, CR3014) that target the  
148 receptor binding site of SARS-CoV failed to bind 2019-nCoV spike protein,  
149 indicating that it is necessary to develop novel monoclonal antibodies that could bind  
150 specifically to 2019-nCoV RBD. Interestingly, it was reported that the antibody  
151 CR3022 could neutralize the antibody CR3014 escape viruses, and that no escape  
152 variants could be generated with CR3022 [5]. Furthermore, the mixture of CR3022  
153 and CR3014 neutralized SARS-CoV in a synergistic fashion by recognizing different  
154 epitopes on RBD [5]. Therefore, CR3022 has the potential to be developed as  
155 candidate therapeutics, alone or in combination with other neutralizing antibodies, for  
156 the prevention and treatment of 2019-nCoV infections. We expect more cross-reactive

157 antibodies against 2019-nCoV and SARS-CoV or other coronaviruses to be identified  
158 soon, facilitating the development of effective antiviral therapeutics and vaccines.

159

## 160 **Acknowledgments**

161 This work was supported by grants from the National Natural Science Foundation of  
162 China (81822027, 81630090), National Key R&D Program of China  
163 (2019YFA0904400), National Megaprojects of China for Major Infectious Diseases  
164 (2018ZX10301403), and the grant from Chinese Academy of Medical Sciences  
165 (2019PT350002).

166

## 167 **Declaration of interest statement**

168 No potential conflict of interest was reported by the authors.

169

## 170 **Figure legend**

171 Figure 1. (a) Phylogenetic analysis of 2019-nCoV spike glycoprotein from its protein  
172 BLAST sequences. The neighbour-joining tree was constructed using MEGA X,  
173 tested by bootstrap method of 2000 replicates, and edited by the online tool of iTOL  
174 (v5). (b) The simulated model of 2019-nCoV RBD binding to  
175 SARS-CoV-RBD-specific antibodies (m396, 80R, and F26G19). (c) Protein sequence  
176 alignment of 2019-nCoV and SARS-CoV RBD, showing the predominant residues  
177 that contribute to interactions with SARS-CoV-specific antibodies. (d) The  
178 comparison of the complex structures of SARS-CoV-RBD and  
179 SARS-CoV-RBD-specific antibodies (shown in the first row) and models of  
180 2019-nCoV-RBD and SARS-CoV-RBD-specific antibodies (shown in the second  
181 row). (e) Binding of monoclonal antibodies to 2019-nCoV RBD determined by  
182 ELISA. (f) Binding profiles of 2019-nCoV RBD to ACE2 and antibodies, and (g)  
183 competition of CR3022 and ACE2 with 2019-nCoV RBD measured by BLI in  
184 OctetRED96. Binding kinetics was evaluated using a 1:1 Langmuir binding model by



185 ForteBio Data Analysis 7.0 software.

186

187

188

189

190 1. Jasper F-W C, Kin-H K, Zheng Z, et al. Genomic characterization of the 2019 novel  
191 human-pathogenic coronavirus isolated from patients with acute respiratory disease in Wuhan,  
192 Hubei, China. *Emerging Microbes & Infections*. 2020.

193 2. Shi Z-L, Zhou P, Yang X-L, et al. Discovery of a novel coronavirus associated with the recent  
194 pneumonia outbreak in humans and its potential bat origin. *bioRxiv*. 2020:2020.01.22.914952.

195 3. Zhu Z, Chakraborti S, He Y, et al. Potent cross-reactive neutralization of SARS coronavirus  
196 isolates by human monoclonal antibodies. *Proceedings of the National Academy of Sciences*.  
197 2007;104(29):12123-12128.

198 4. ter Meulen J, Bakker AB, van den Brink EN, et al. Human monoclonal antibody as  
199 prophylaxis for SARS coronavirus infection in ferrets. *The Lancet*.  
200 2004;363(9427):2139-2141.

201 5. Ter Meulen J, Van Den Brink EN, Poon LL, et al. Human monoclonal antibody combination  
202 against SARS coronavirus: synergy and coverage of escape mutants. *PLoS medicine*.  
203 2006;3(7).

204 6. Sui J, Li W, Murakami A, et al. Potent neutralization of severe acute respiratory syndrome  
205 (SARS) coronavirus by a human mAb to S1 protein that blocks receptor association.  
206 *Proceedings of the National Academy of Sciences*. 2004;101(8):2536-2541.

207 7. Traggiai E, Becker S, Subbarao K, et al. An efficient method to make human monoclonal  
208 antibodies from memory B cells: potent neutralization of SARS coronavirus. *Nature medicine*.  
209 2004;10(8):871-875.

210 8. Gallagher TM, Buchmeier MJ. Coronavirus spike proteins in viral entry and pathogenesis.  
211 *Virology*. 2001;279(2):371-374.

212 9. Wong SK, Li W, Moore MJ, et al. A 193-amino acid fragment of the SARS coronavirus S  
213 protein efficiently binds angiotensin-converting enzyme 2. *Journal of Biological Chemistry*.  
214 2004;279(5):3197-3201.

215 10. Prabakaran P, Gan J, Feng Y, et al. Structure of severe acute respiratory syndrome coronavirus  
216 receptor-binding domain complexed with neutralizing antibody. *Journal of Biological  
217 Chemistry*. 2006;281(23):15829-15836.

218 11. Pak JE, Sharon C, Satkunarajah M, et al. Structural insights into immune recognition of the  
219 severe acute respiratory syndrome coronavirus S protein receptor binding domain. *Journal of  
220 molecular biology*. 2009;388(4):815-823.

221 12. Hwang WC, Lin Y, Santelli E, et al. Structural Basis of Neutralization by a Human  
222 Anti-severe Acute Respiratory Syndrome Spike Protein Antibody, 80R. *Journal of Biological  
223 Chemistry*.281(45):34610-34616.

224 13. Li F, Li W, Farzan M, et al. Structure of SARS coronavirus spike receptor-binding domain  
225 complexed with receptor. *Science*. 2005;309(5742):1864-1868.

- 226 14. Walls AC, Xiong X, Park Y-J, et al. Unexpected receptor functional mimicry elucidates  
227 activation of coronavirus fusion. *Cell*. 2019;176(5):1026-1039. e15.
- 228 15. Ying T, Prabakaran P, Du L, et al. Junctional and allele-specific residues are critical for  
229 MERS-CoV neutralization by an exceptionally potent germline-like antibody. *Nature*  
230 *communications*. 2015;6:8223.
- 231

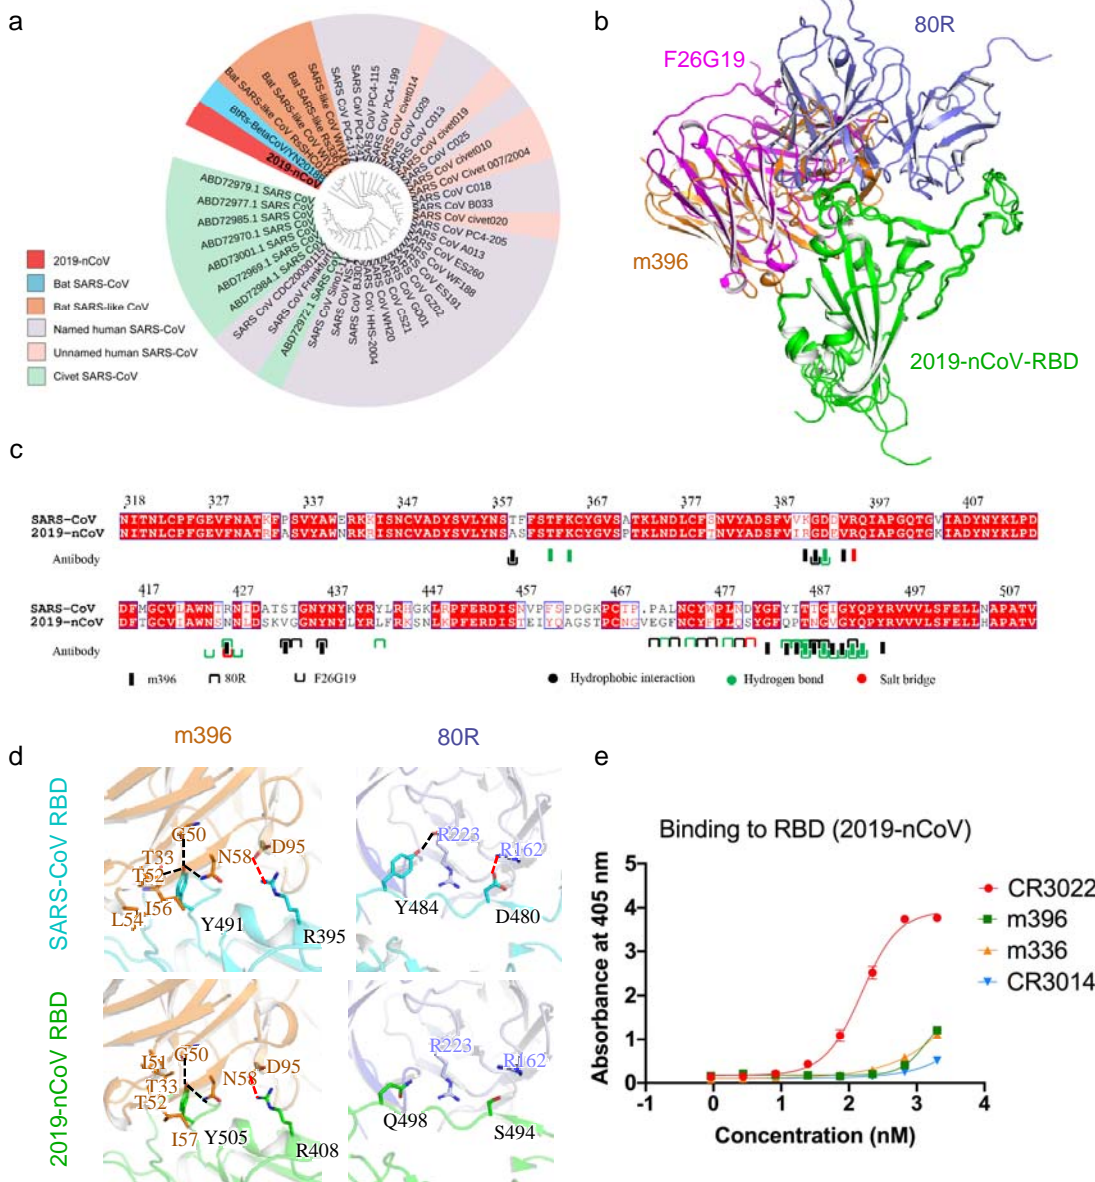

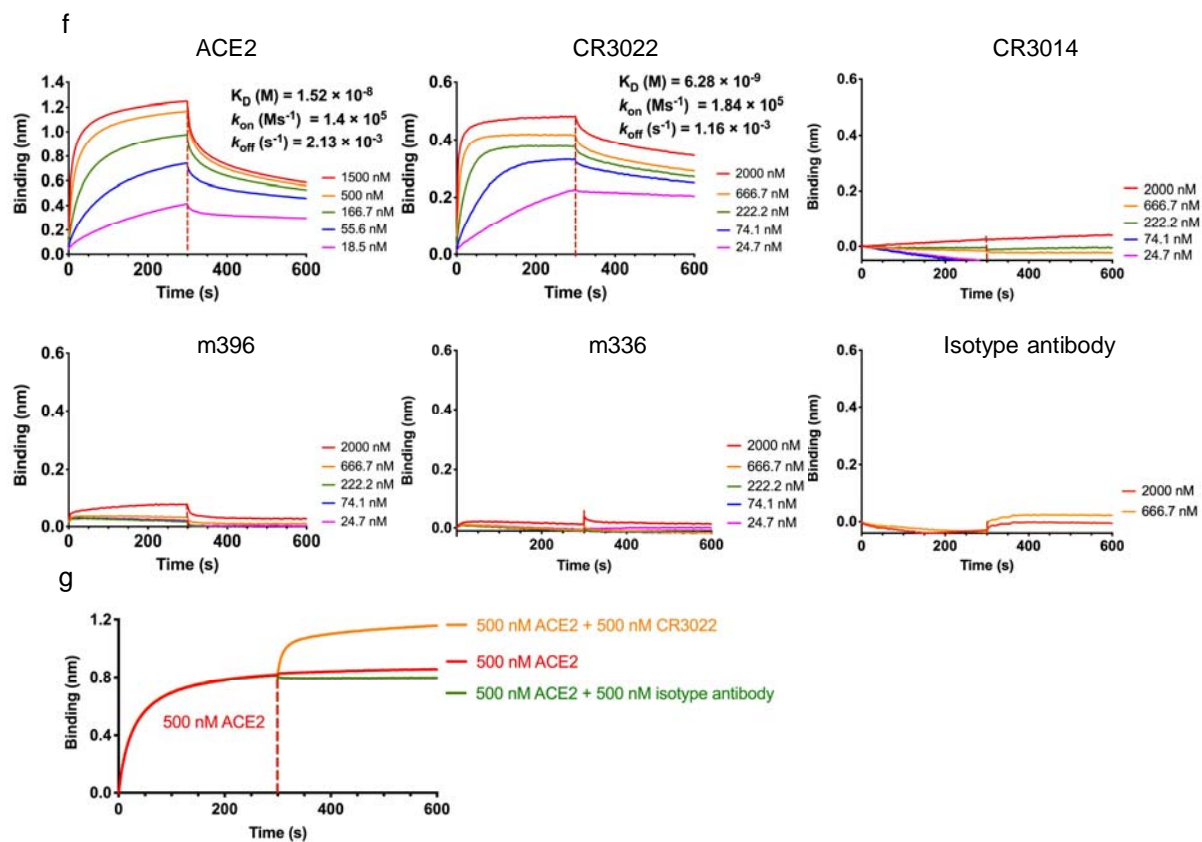

Source: https://www.biorxiv.org/content/10.1101/2020.01.28.923011v1.full.pdf
